# Supplementary material for: Nanoemulsions of Phoenix dactylifera L. (Decaffeinated) and Coffea arabica L. Extracts as a Novel Approach for the Treatment of Carbon Tetrachloride-Mediated Liver Fibrosis
Source: MDPI journal article supplement (doi:10.3390/antiox13030355), 2024-03-16
Supplement: s1 [file s1]

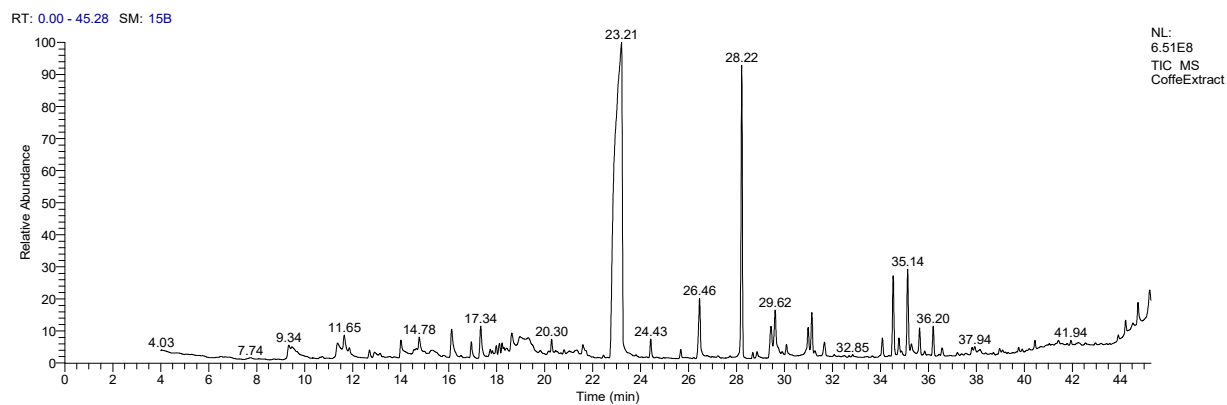

**Figure S1.** Compounds Identified in the ACS extract using GC-MS

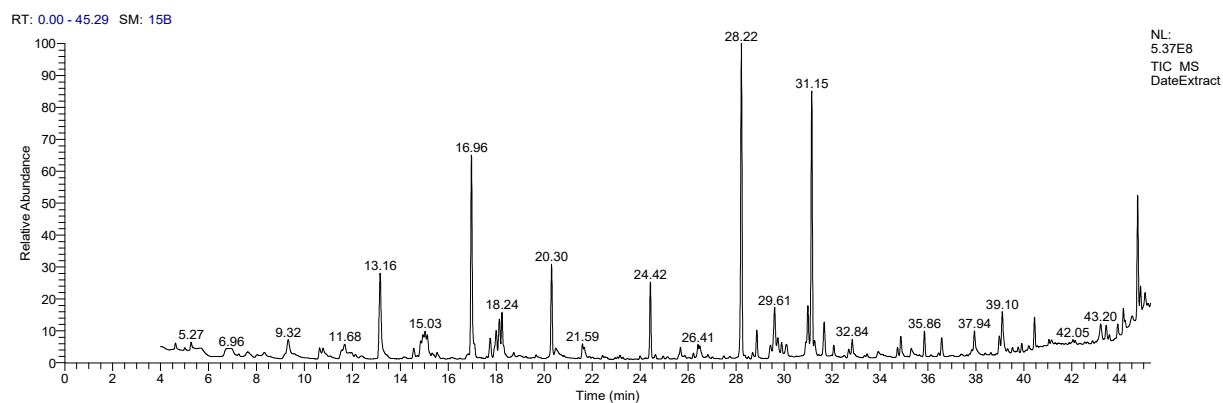

**Figure S2.** Compounds Identified in the PSC extract using GC-MS

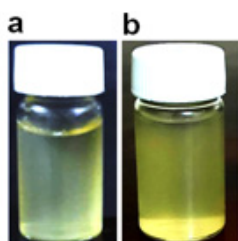

**Figure S3.** Nanoemulsion of (a) NE-ACSE and (b) NE-PSCE

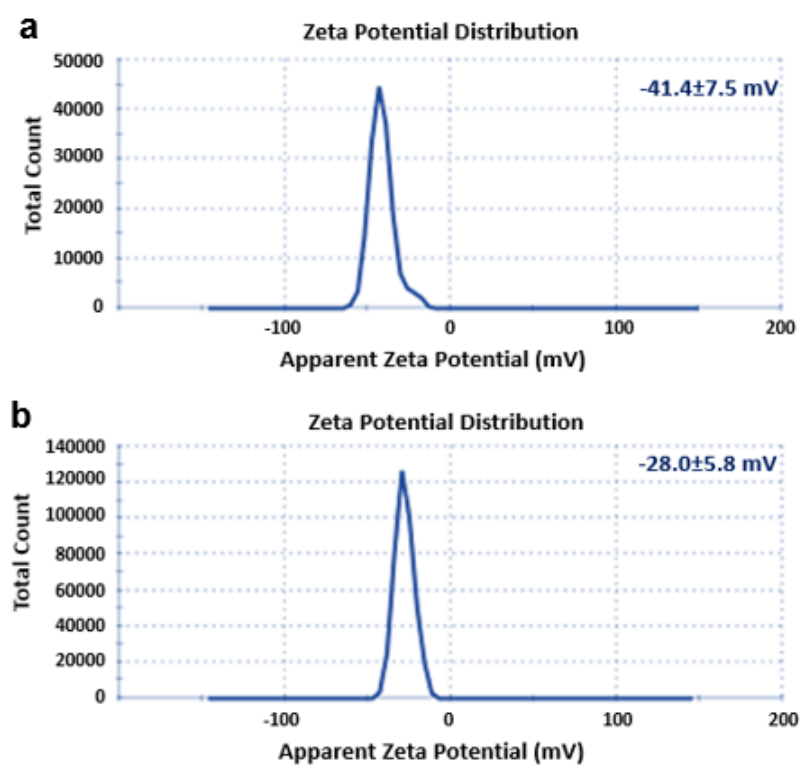

**Figure S4.**  $\zeta$ -potential (a, b) of the developed NE-ACSE and NE-PSCE, respectively.
